# Supplementary material for: Identification and Optimization of Novel Inhibitors of the Polyketide Synthase 13 Thioesterase Domain with Antitubercular Activity
Source: PubMed Central journal article supplement (PMC10683028; doi:10.1021/acs.jmedchem.3c01514), 2023-11-10

## Supporting Information

### Identification and optimisation of novel inhibitors of the Polyketide synthase 13 thioesterase domain with antitubercular activity

Simon R. Green<sup>†\*</sup>, Caroline Wilson<sup>†</sup>, Thomas C. Eadsforth<sup>†</sup>, Avinash S. Puneekar<sup>†</sup>, Fabio K. Tamaki<sup>†</sup>, Gavin Wood<sup>†</sup>, Nicola Caldwell<sup>†</sup>, Barbara Forte<sup>†</sup>, Neil R. Norcross<sup>†</sup>, Michael Kiczun<sup>†</sup>, John M. Post<sup>†</sup>, Eva Maria Lopez-Román<sup>‡</sup>, Curtis A. Engelhart<sup>‡</sup>, Iva Lukac<sup>†</sup>, Fabio Zuccotto<sup>†</sup>, Ola Epemolu<sup>†</sup>, Helena I. M. Boshoff<sup>†</sup>, Dirk Schnappinger<sup>‡</sup>, Chris Walpole<sup>‡</sup>, Ian H. Gilbert<sup>†</sup>, Kevin D. Read<sup>†</sup>, Paul G. Wyatt<sup>†</sup> and Beatriz Baragaña<sup>†\*</sup>

<sup>†</sup>Drug Discovery Unit, Division of Biological Chemistry and Drug Discovery, School of Life Sciences, University of Dundee, Dundee, DD1 5EH, UK

<sup>‡</sup>Department of Microbiology and Immunology, Weill Cornell Medical College, New York, NY, 10065, USA

<sup>‡</sup>Global Health Medicines R&D, GlaxoSmithKline, Severo Ochoa 2, Tres Cantos, 28760, Madrid, Spain

<sup>†</sup>Tuberculosis Research Section, Laboratory of Clinical Immunology and Microbiology, NIAID, NIH, 9000 Rockville Pike, Bethesda, MD, 20892, USA

<sup>‡</sup>Structural Genomics Consortium, Research Institute of the McGill University Health Centre, 1001 Boulevard Décarie, Site Glen Block E, ES1.1614, Montréal, QC H4A 3J1, Canada

**\*Corresponding Author Information:**

[S.R.Green@dundee.ac.uk](mailto:S.R.Green@dundee.ac.uk)

[b.baragana@dundee.ac.uk](mailto:b.baragana@dundee.ac.uk)

### Table of Contents

|                                                                                                                                                            |           |
|------------------------------------------------------------------------------------------------------------------------------------------------------------|-----------|
| <b>Title Page</b>                                                                                                                                          | <b>S1</b> |
| <b>Table S1:</b> Crystal data collection and refinement statistics.                                                                                        | <b>S2</b> |
| <b>Supplemental Figure 1:</b> Pks13 binding pocket overlays for compounds <b>50</b> , <b>14</b> & <b>33</b> .                                              | <b>S3</b> |
| <b>Supplemental Figure 2:</b> Dose response curves for compounds <b>50</b> , <b>14</b> , <b>15</b> & <b>33</b> tested against a tet-regulated Pks13 strain | <b>S3</b> |
| <b>Representative <i>in vivo</i> and <i>in vitro</i> compound HPLC UV traces:</b>                                                                          | <b>S4</b> |

**Table S1:** Crystal data collection and refinement statistics.

|                                                         | <b>Pks13-TE:50</b>               | <b>Pks13-TE:33</b>               | <b>Pks13-TE:14</b>               |
|---------------------------------------------------------|----------------------------------|----------------------------------|----------------------------------|
| <b>PDB ID</b>                                           | 8Q0T                             | 8Q0U                             | 8Q17                             |
| <b>Data Collection</b>                                  |                                  |                                  |                                  |
| Space group                                             | P2 <sub>1</sub> 2 <sub>1</sub> 2 | P2 <sub>1</sub> 2 <sub>1</sub> 2 | P2 <sub>1</sub> 2 <sub>1</sub> 2 |
| Cell dimensions                                         |                                  |                                  |                                  |
| a, b, c (Å)                                             | 88.3, 110.2, 57.9                | 87.6, 108.6, 57.5                | 88.4, 109.8, 57.6                |
| α, β, γ (°)                                             | 90, 90, 90                       | 90, 90, 90                       | 90, 90, 90                       |
| Resolution (Å)                                          | 88.27-1.80 (1.84-1.80)           | 68.17 - 1.8 (1.84 - 1.8)         | 84.51 - 1.71 (1.77 - 1.71)       |
| Total reflections                                       | 364265 (22465)                   | 344236 (18163)                   | 112784 (6923)                    |
| Unique reflections                                      | 51471 (3078)                     | 48490 (3026)                     | 56541 (3520)                     |
| Redundancy                                              | 7.1 (7.3)                        | 7.1 (6.0)                        | 11.6 (7.5)                       |
| Completeness (%)                                        | 97.1 (99.9)                      | 93.8 (100)                       | 92.0 (54.5)                      |
| <i>I</i> / <i>σ</i> <i>I</i>                            | 12.6 (1.6)                       | 4.1 (1.3)                        | 12.6 (1.1)                       |
| Wilson B-factor                                         | 23.3                             | 21.42                            | 24.131                           |
| <i>R</i> <sub>merge</sub>                               | 0.096 (1.109)                    | 0.301 (1.128)                    | 0.112 (1.991)                    |
| <i>R</i> <sub>meas</sub>                                | 0.11 (1.281)                     | 0.349 (1.352)                    | 0.118 (2.140)                    |
| CC <sub>1/2</sub>                                       | 0.999 (0.625)                    | 0.93 (0.540)                     | 0.995 (0.764)                    |
|                                                         |                                  |                                  |                                  |
| <b>Refinement</b>                                       |                                  |                                  |                                  |
| Resolution (Å)                                          | 1.80                             | 1.80                             | 1.71                             |
| No. of reflections                                      | 48824 (3627)                     | 45754 (3565)                     | 55847 (3500)                     |
| No. of reflections as <i>R</i> <sub>free</sub>          | 2565 (202)                       | 2430 (195)                       | 2724 (195)                       |
| <i>R</i> <sub>work</sub> / <i>R</i> <sub>free</sub> (%) | 18.6 / 22.4                      | 18.9 / 23.5                      | 19.53 / 23.87                    |
| <i>No. of non-hydrogen atoms</i>                        |                                  |                                  |                                  |
| Protein                                                 | 4298                             | 4323                             | 4351                             |
| Ligand                                                  | 60                               | 68                               | 118                              |
| Water                                                   | 301                              | 444                              | 340                              |
| <i>B</i> -factors (Å <sup>2</sup> )                     |                                  |                                  |                                  |
| Average                                                 | 32.106                           | 30.259                           | 34.15                            |
| Protein                                                 | 32.05                            | 29.69                            | 33.40                            |
| Ligand                                                  | 26.81                            | 43.44                            | 45.41                            |
| Water                                                   | 34.09                            | 39.17                            | 38.29                            |
| <i>R.M.S. deviations</i>                                |                                  |                                  |                                  |
| Bond lengths (Å)                                        | 0.0183                           | 0.0179                           | 0.0196                           |
| Bond angles (°)                                         | 1.80                             | 1.86                             | 1.97                             |
| Clashscore                                              | N/A                              | 5.14                             | 2.98                             |
| <i>Ramachandran Plot</i>                                |                                  |                                  |                                  |
| Favoured (%)                                            | 98.33                            | 97.94                            | 97.8                             |
| Allowed (%)                                             | 1.48                             | 1.87                             | 2.0                              |
| Outliers (%)                                            | 0.19                             | 0.19                             | 0.19                             |

A

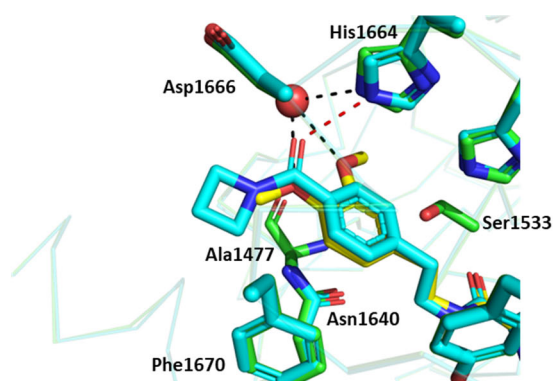

B

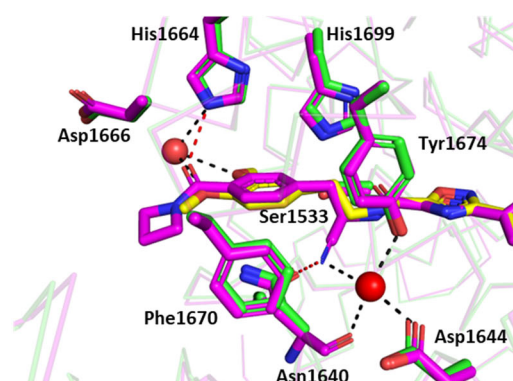

### Supplemental Figure 1: Pks13 binding pocket overlays for compounds 50, 14 & 33.

Superimposition of the crystal structures of Pks13-50 (PDB ID 8Q0T: yellow and green) and 14 (PDB ID 8Q17: cyan) showing the carbonyl oxygen of the azetidine making an extra direct hydrogen bond interaction (dashed red line) between the side chain of His1664, replacing a water molecule previously bound in the 50 structure (A). A similar binding mode is seen in the crystal structure comparison of Pks13-33 (PDB ID 8Q0U: purple), with an additional hydrogen bond formed between the cyano group and side chain of Asn1640 (B).

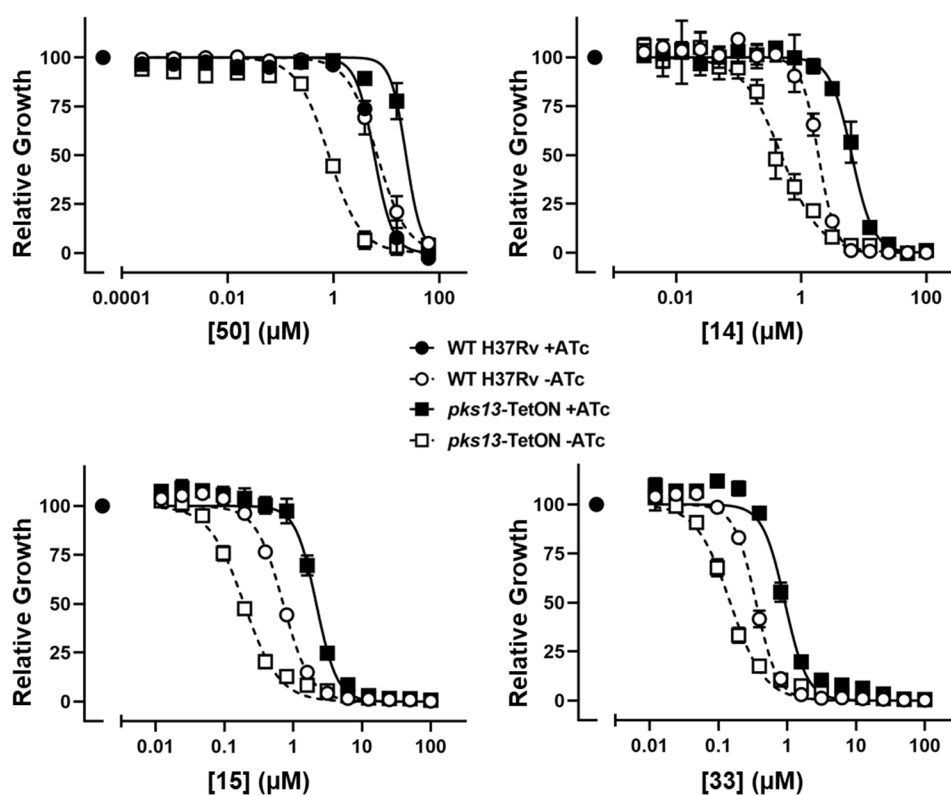

### Supplemental Figure 2: Dose response curves for compounds 50, 14, 15 & 33 tested against a tet-regulated Pks13 strain

Growth in the presence of anhydrotetracycline (ATc) results in modest transcriptional overexpression of *pks13* while removal of ATc results in transcriptional repression of *pks13* expression. Growth in the presence of compounds is shown relative to DMSO treated samples. Data are representative of two independent experiments.

# HPLC Traces

## In-vivo compounds

15

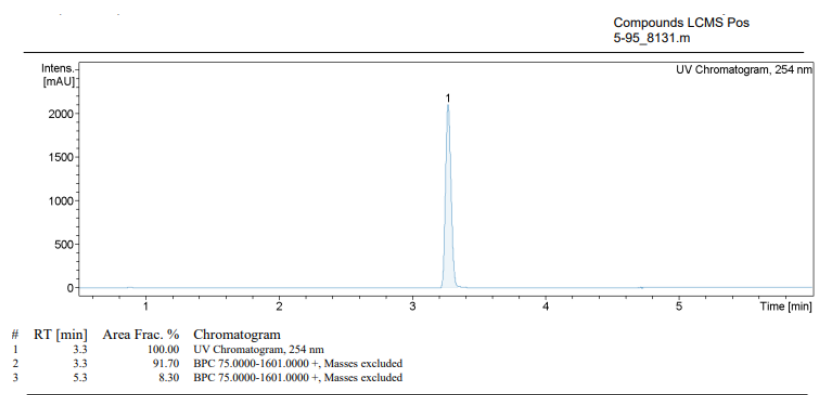

44

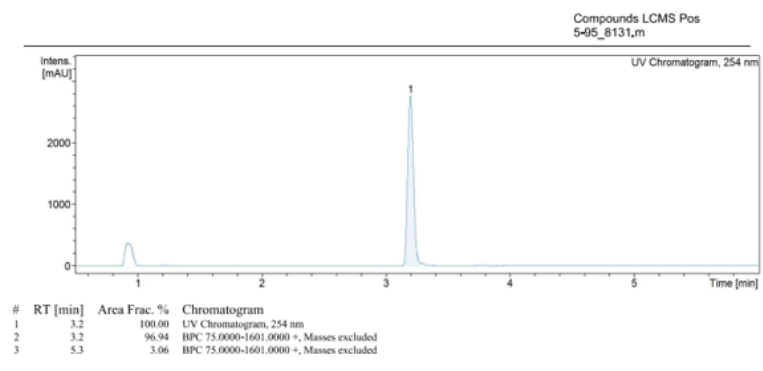

80

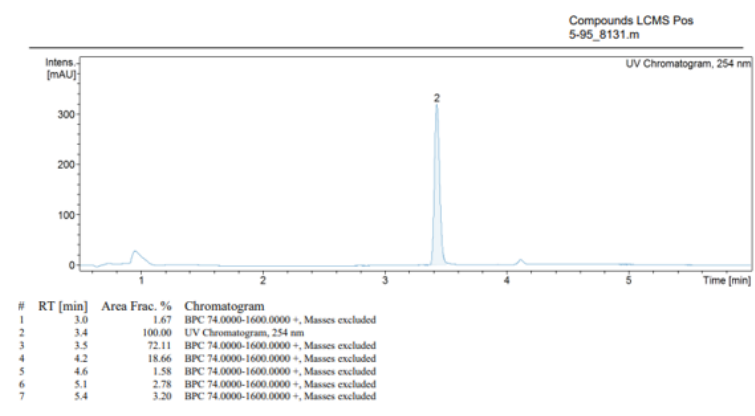

## Representative In-vitro compounds

16

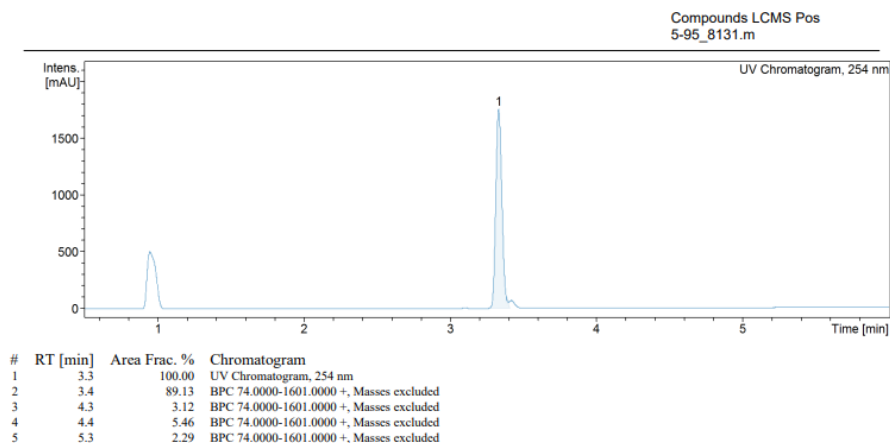

17

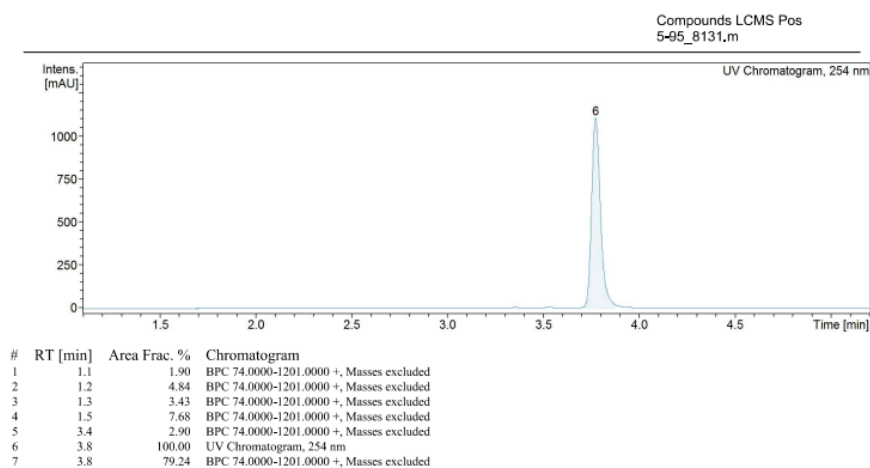

101

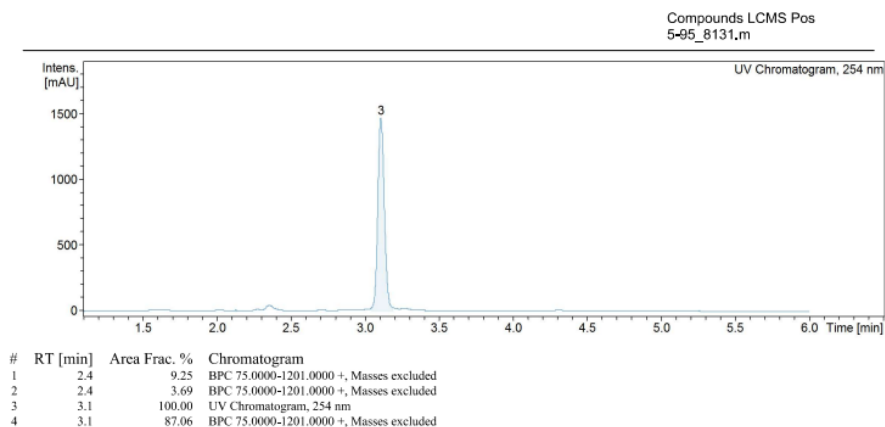

61

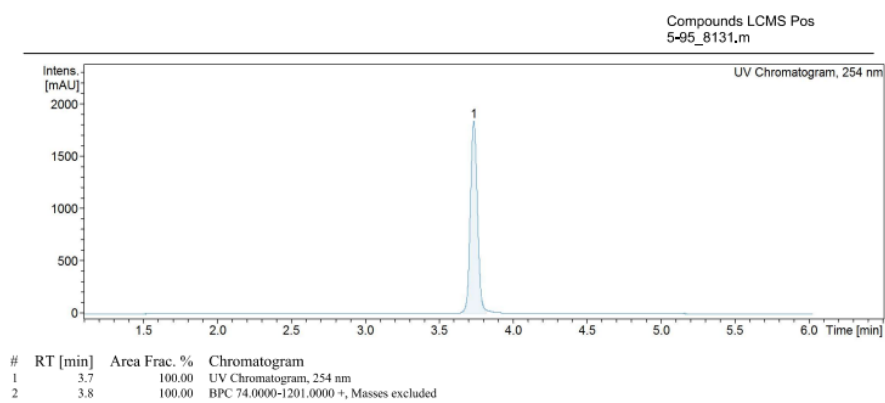

62

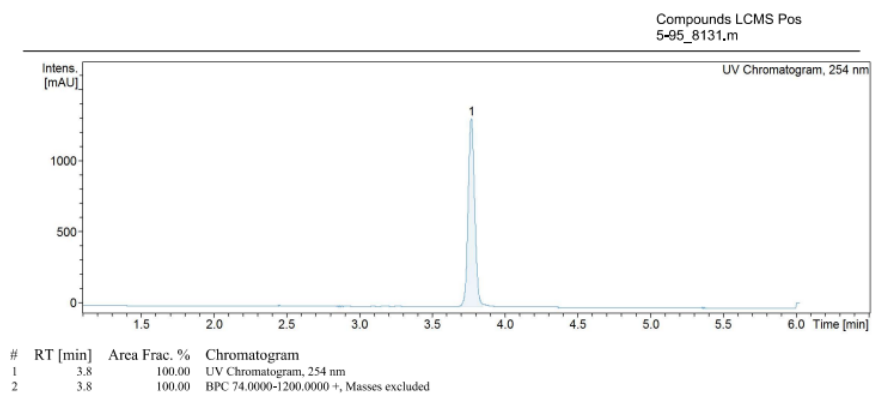

63

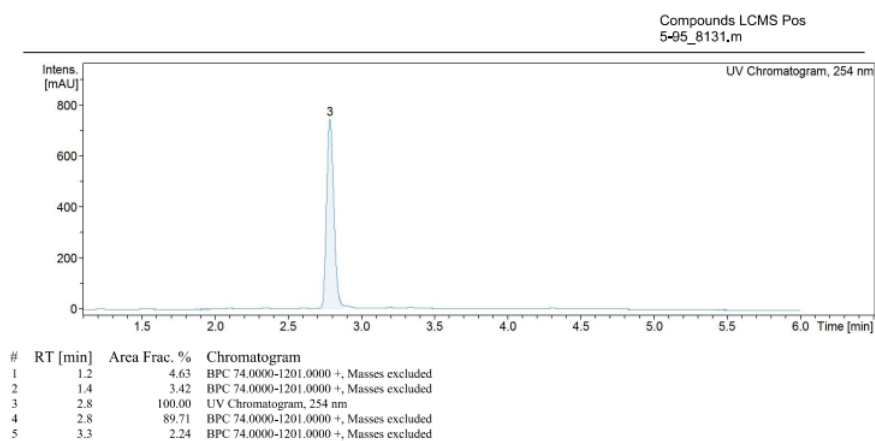

64

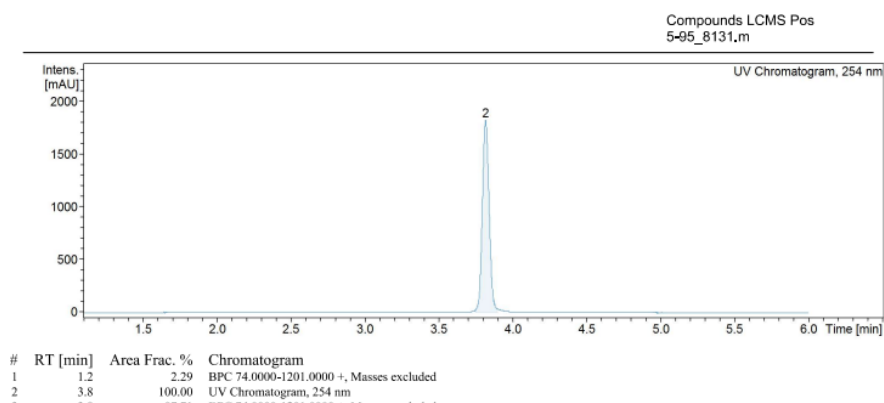

65

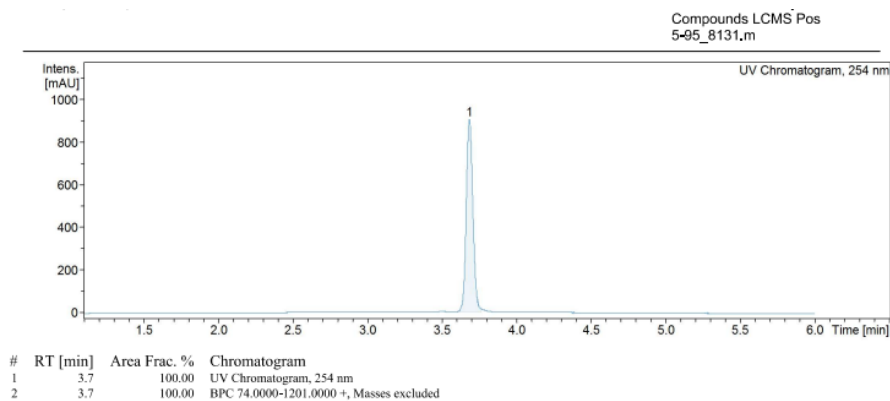

66

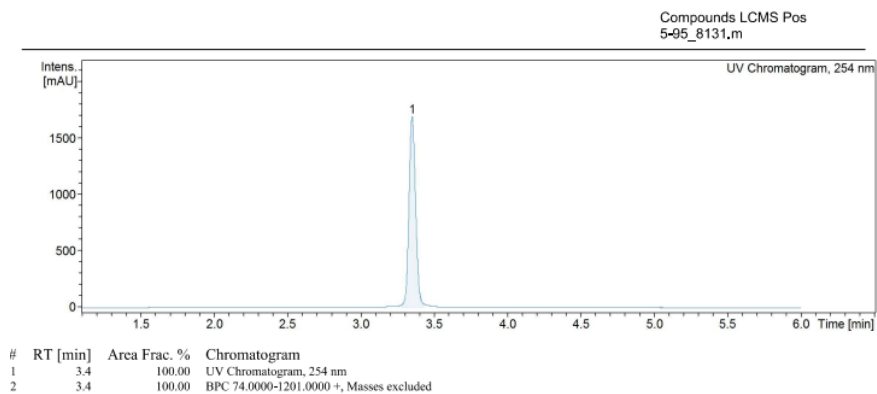

67

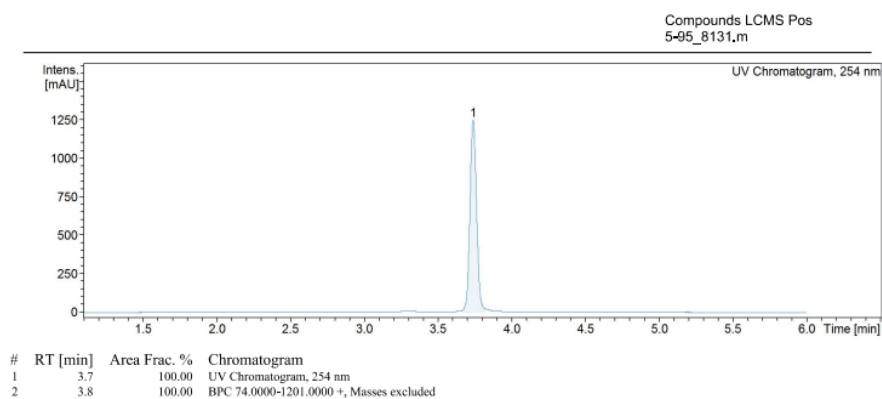

3

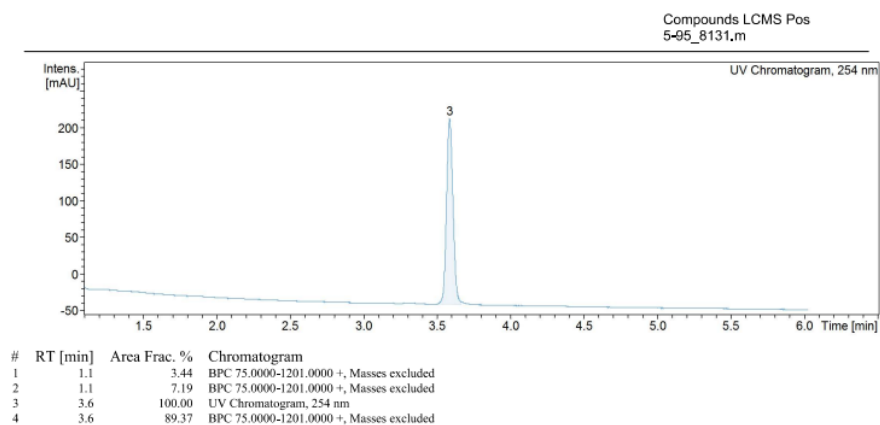

45

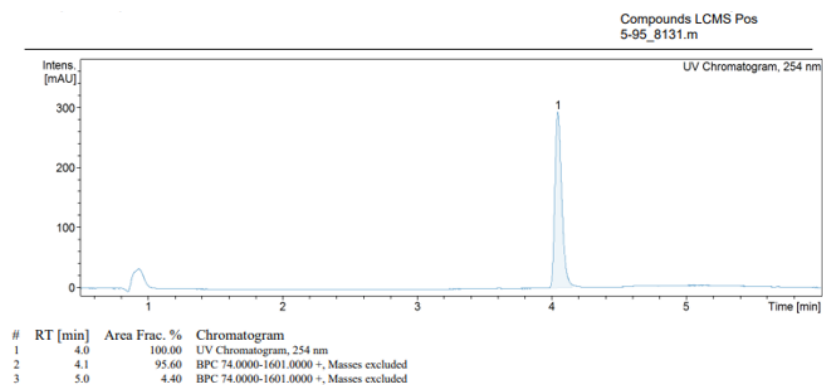

Supplement: jm3c01514_si_001.pdf [file jm3c01514_si_001.pdf]
